# Supplementary material for: A Systematic Review of Internet of Things in Clinical Laboratories: Opportunities, Advantages, and Challenges
Source: MDPI journal article supplement (doi:10.3390/s22208051), 2022-10-21
Supplement: s1 [file s1]

## Supplementary Materials

### Full-Text Screening (Excluded Studies) (N=23):

Papers that were not concept papers or primary research articles, and that did not belong to any of the focal points of IoT in laboratory processes illustrated in Figure 2 were excluded. Books, conference papers, symposiums commentaries, and review articles were excluded. Non-English studies were omitted as well. Their bibliographies were screened to identify any relevant paper pertaining to our theme.

### Did not belong to any focal points of IoT laboratory processes:

1. Chao Y, Jiang W, Wang X, Wang X, Song J, Chen C, Zhou J, Huang Q, Hu J, Song Y. Discovery of efficacy biomarkers for non-small cell lung cancer with first- line anti-PD-1 immunotherapy by data-independent acquisition mass spectrometry. *Clin Exp Immunol*. 2022; 208(1):60–71. doi: 10.1093/cei/uxac021.
2. Li H, Wang Y, Jiang J, Zhao H, Feng X, Zhao B, Wang L. A Novel Human Microbe-Disease Association Prediction Method Based on the Bidirectional Weighted Network. *Front Microbiol*. 2019; 10:676. doi: 10.3389/fmicb.2019.00676
3. Lin D, Wang Y, Wang T, Zhu Y, Lin X, Lin Y, et al. Metabolite profiling of human blood by surface-enhanced Raman spectroscopy for surgery assessment and tumor screening in breast cancer. *Anal Bioanal Chem*. 2020; 412(7):1611-1618. doi: 10.1007/s00216-020-02391-4.
4. Lin D, Wu Q, Qiu S, Chen G, Feng S, Chen R, et al. Label-free liquid biopsy based on blood circulating DNA detection using SERS-based nanotechnology for nasopharyngeal cancer screening. *Nanomedicine*. 2019; 22:102100. doi: 10.1016/j.nano.2019.102100.
5. Lin X, Wang Y, Wang L, Lu Y, Li J, Lu D, et al. Interference-free and high precision biosensor based on surface enhanced Raman spectroscopy integrated with surface molecularly imprinted polymer technology for tumor biomarker detection in human blood. *Biosens Bioelectron*. 2019; 143:111599. doi: 10.1016/j.bios.2019.111599
6. Tong T, Gao Q, Guerrero R, Ledig C, Chen L, Rueckert D, Initiative ADN. A Novel Grading Biomarker for the Prediction of Conversion From Mild Cognitive Impairment to Alzheimer's Disease. *IEEE Trans Biomed Eng*. 2017;64(1):155-165. doi: 10.1109/TBME.2016.2549363.
7. Uehara F, Hori K, Hasegawa Y, Yoshimura S, Hori S, Kitamura M, et al. Impact of Masticatory Behaviors Measured With Wearable Device on Metabolic Syndrome: Cross-sectional Study. *JMIR Mhealth Uhealth*. 2022 Mar 24;10(3):e30789. doi: 10.2196/30789. PMID: 35184033; PMCID: PMC8990367.
8. Vashistha R, Dangi AK, Kumar A, Chhabra D, Shukla P. Futuristic biosensors for cardiac health care: an artificial intelligence approach. *3 Biotech*. 2018;8(8):358. doi: 10.1007/s13205-018-1368-y.
9. Wu C, Zhong J, Lin L, Chen Y, Xue Y, Shi P. Segmentation of HE-stained meningioma pathological images based on pseudo-labels. *PLoS One*. 2022; 17(2):e0263006. doi: 10.1371/journal.pone.0263006.

10. Xu Y, Wang Y, Lin H, Liu X, Zheng Z, Wang T, Feng S. Serum analysis method combining cellulose acetate membrane purification with surface-enhanced Raman spectroscopy for non-invasive HBV screening. *IET Nanobiotechnol.* 2020 Feb 1;141:98-104.

#### **Non-English studies:**

11. Díaz de León-Castañeda C. Salud electrónica (e-Salud): un marco conceptual de implementación en servicios de salud. *Gac Med Mex.* 2019;155(2):176-183. doi: 10.24875/GMM.18003788.
12. He Y, Yang B, Xiong S, Li Q. Design of Portable Spirometer Based on Internet of Things of Medicine. *Zhongguo Yi Liao Qi Xie Za Zhi.* 2018;42(2):103-106. doi: 10.3969/j.issn.1671-7104.2018.02.007.

#### **Books/Conference Papers/Symposiums/Commentaries/Reviews:**

13. Azrour M, Irshad A, Chaganti R. IoT and Smart Devices for Sustainable Environment.
14. Calvillo-Arbizu J, Román-Martínez I, Reina-Tosina J. Internet of things in health: Requirements, issues, and gaps. *Computer Methods and Programs in Biomedicine.* 2021; 208:106231.
15. Dong T, Santos S, Yang Z, Yang S, Kirkhus NE. Sputum and salivary protein biomarkers and point-of-care biosensors for the management of COPD. *Analyst.* 2020;145(5):1583-604.
16. Gupta N, Paiva S, editors. *IoT and ICT for Healthcare Applications.* Springer International Publishing; 2020 Aug 12.
17. Inácio PR, Duarte A, Fazendeiro P, Pombo N, editors. *5th EAI International Conference on IoT Technologies for HealthCare.* Cham: Springer; 2020.
18. Li Y, Lu H, editors. *3rd EAI International Conference on Robotic Sensor Networks.* Springer; 2020.
19. M. S. Packianather, N. L. Munizaga, S. Zouwail and M. Saunders, "Development of soft computing tools and IoT for improving the performance assessment of analysers in a clinical laboratory," *2019 14th Annual Conference System of Systems Engineering (SoSE)*, 2019, pp. 158-163, doi: 10.1109/SYSESE.2019.8753830.
20. Velliangiri S, Gunasekaran M, Karthikeyan P. *Secure Communication for 5G and IoT Networks.* Springer International Publishing AG; 2021.
21. Yang X, Wang X, Li X, Gu D, Liang C, Li K, Zhang G, Zhong J. Exploring emerging IoT technologies in smart health research: a knowledge graph analysis. *BMC Medical Informatics and Decision Making.* 2020;20(1):1-2.
22. Yetisen AK, Martinez-Hurtado JL, Ünal B, Khademhosseini A, Butt H. Wearables in Medicine. *Adv Mater.* 2018;30(33):e1706910. doi: 10.1002/adma.201706910.
23. Yoo J, Soh JY, Lee WH, Chang DK, Lee SU, Cha WC. Experience of Emergency Department Patients With Using the Talking Pole Device: Prospective Interventional Descriptive Study. *JMIR Mhealth Uhealth.* 2018;6(11):e191. doi: 10.2196/mhealth.9676.

**Supplementary Table S1:** Findings for the JBI Critical Appraisal Tool.

| <b>Study and Year</b> | <b>1. Is the source of the text clearly identified?</b> | <b>2. Does the source of text have standing in the field of expertise?</b> | <b>3. Are the interests of the relevant population the central focus of the opinion?</b> | <b>4. Is the stated position the result of an analytical process, and is there logic in the opinion expressed?</b> | <b>5. Is there reference to the extant literature?</b> | <b>6. Is any incongruence with the literature/sources logically defended?</b> |
|-----------------------|---------------------------------------------------------|----------------------------------------------------------------------------|------------------------------------------------------------------------------------------|--------------------------------------------------------------------------------------------------------------------|--------------------------------------------------------|-------------------------------------------------------------------------------|
| Alam, 2015            | Yes                                                     | Yes                                                                        | No                                                                                       | Yes                                                                                                                | Yes                                                    | Unclear                                                                       |
| Alonso, 2020          | Yes                                                     | Yes                                                                        | No                                                                                       | Yes                                                                                                                | Yes                                                    | Yes                                                                           |
| Austerjost, 2018      | Yes                                                     | Yes                                                                        | Yes                                                                                      | Yes                                                                                                                | Yes                                                    | No                                                                            |
| Bibi, 2020            | Yes                                                     | Unclear                                                                    | Yes                                                                                      | Yes                                                                                                                | Yes                                                    | Yes                                                                           |
| Celesti, 2020         | Yes                                                     | Yes                                                                        | Yes                                                                                      | Yes                                                                                                                | Unclear                                                | Unclear                                                                       |
| Galindo-Romera, 2017  | Yes                                                     | Unclear                                                                    | Yes                                                                                      | Yes                                                                                                                | Yes                                                    | Yes                                                                           |
| Guo, 2021             | Yes                                                     | Unclear                                                                    | Unclear                                                                                  | Yes                                                                                                                | Yes                                                    | Yes                                                                           |
| Kalasin, 2020 (1)     | Yes                                                     | No                                                                         | Yes                                                                                      | Unclear                                                                                                            | No                                                     | Yes                                                                           |
| Kalasin, 2020 (2)     | Yes                                                     | Yes                                                                        | Yes                                                                                      | Yes                                                                                                                | Unclear                                                | Yes                                                                           |
| Kang, 2018            | Yes                                                     | Yes                                                                        | Yes                                                                                      | Yes                                                                                                                | Yes                                                    | Yes                                                                           |
| Ma, 2020              | Yes                                                     | Yes                                                                        | Yes                                                                                      | Yes                                                                                                                | Yes                                                    | Yes                                                                           |
| Majdoubi, 2021        | Yes                                                     | Yes                                                                        | Yes                                                                                      | Yes                                                                                                                | Yes                                                    | Yes                                                                           |
| Neil, 2018            | Yes                                                     | Yes                                                                        | Unclear                                                                                  | Yes                                                                                                                | No                                                     | Yes                                                                           |
| Ochôa, 2019           | Yes                                                     | Yes                                                                        | Yes                                                                                      | Yes                                                                                                                | Yes                                                    | Yes                                                                           |
| Porr, 2020            | Yes                                                     | Yes                                                                        | Yes                                                                                      | Yes                                                                                                                | Yes                                                    | Yes                                                                           |
| Shumate, 2018         | Yes                                                     | Yes                                                                        | Yes                                                                                      | Yes                                                                                                                | Yes                                                    | Yes                                                                           |
| Wang, 2018            | Yes                                                     | Yes                                                                        | Yes                                                                                      | No                                                                                                                 | Yes                                                    | Yes                                                                           |
| Zhu, 2020             | Yes                                                     | Yes                                                                        | Yes                                                                                      | Unclear                                                                                                            | Yes                                                    | Yes                                                                           |

Checklist includes: Yes, No, Unclear, Not Applicable
